# Supplementary material for: Eco-Friendly Synthesis, Characterization and Biological Evaluation of Some Novel Pyrazolines Containing Thiazole Moiety as Potential Anticancer and Antimicrobial Agents
Source: PubMed Central journal article supplement (PMC6278264; doi:10.3390/molecules23112970), 2018-11-14
Supplement: molecules-23-02970-s001.pdf [file molecules-23-02970-s001.pdf]

# **Eco-Friendly Synthesis, Characterization and Biological Evaluation of Some Novel Pyrazolines Containing Thiazole Moiety as Potential Anticancer and Antimicrobial Agents**

Mastoura M. Edrees<sup>1,2,\*</sup>, Sraa Abu- Melha<sup>1</sup>, Amirah M. Saad<sup>3</sup>, Nabila A. Kheder<sup>4</sup>, Sobhi M. Gomha<sup>4</sup>, and Zeinab A Muhammad<sup>2</sup>

## **General method for the evaluation of Cytotoxic Effects of certain Chemical compound**

Mammalian cell lines: MCF-7 cells (human breast cancer cell line), HepG-2 cells (human Hepatocellular carcinoma) and HCT-116 (colon carcinoma) were obtained from VACSERA Tissue Culture Unit.

Chemicals Used: Dimethyl sulfoxide (DMSO), crystal violet and trypan blue dye were purchased from Sigma (St. Louis, Mo., USA).

Fetal Bovine serum, DMEM, RPMI-1640, HEPES buffer solution, L-glutamine, gentamycin and 0.25% Trypsin-EDTA were purchased from Lonza.

Crystal violet stain (1%): It composed of 0.5% (w/v) crystal violet and 50% methanol then made up to volume with ddH<sub>2</sub>O and filtered through a Whatmann No.1 filter paper.

### Cell line Propagation:

The cells were propagated in Dulbecco's modified Eagle's medium (DMEM) supplemented with 10% heat-inactivated fetal bovine serum, 1% L-glutamine, HEPES buffer and 50µg/ml gentamycin. All cells were maintained at 37°C in a humidified atmosphere with 5% CO<sub>2</sub> and were subcultured two times a week.

Cytotoxicity evaluation using viability assay [36,37]: For cytotoxicity assay, the cells were seeded in 96-well plate at a cell concentration of  $1 \times 10^4$  cells per well in 100µl of growth medium. Fresh medium containing different concentrations of the test sample was added after 24 h of seeding. Serial two-fold dilutions of the tested chemical compound were added to confluent cell monolayers dispensed into 96-well, flat-bottomed microtiter plates (Falcon, NJ, USA) using a multichannel pipette. The microtiter plates were incubated at 37°C in a humidified incubator with 5% CO<sub>2</sub> for a

period of 24 h. Three wells were used for each concentration of the test sample. Control cells were incubated without test sample and with or without DMSO. The little percentage of DMSO present in the wells (maximal 0.1%) was found not to affect the experiment. After incubation of the cells at 37°C, for 24 h, the viable cells yield was determined by a colorimetric method.

In brief, after the end of the incubation period, media were aspirated and the crystal violet solution (1%) was added to each well for at least 30 minutes. The stain was removed and the plates were rinsed using tap water until all excess stain is removed. Glacial acetic acid (30%) was then added to all wells and mixed thoroughly, and then the absorbance of the plates were measured after gently shaken on Microplate reader (TECAN, Inc.), using a test wavelength of 490 nm. All results were corrected for background absorbance detected in wells without added stain. Treated samples were compared with the cell control in the absence of the tested compounds. All experiments were carried out in triplicate. The cell cytotoxic effect of each tested compound was calculated. The optical density was measured with the microplate reader (SunRise, TECAN, Inc, USA) to determine the number of viable cells and the percentage of viability was calculated as  $[(OD_t/OD_c)] \times 100\%$  where  $OD_t$  is the mean optical density of wells treated with the tested sample and  $OD_c$  is the mean optical density of untreated cells. The relation between surviving cells and drug concentration is plotted to get the survival curve of each tumor cell line after treatment with the specified compound. The 50% inhibitory concentration ( $IC_{50}$ ), the concentration required to cause toxic effects in 50% of intact cells, was estimated from graphic plots of the dose response curve for each conc. using Graphpad Prism software (San Diego, CA. USA).

#### **Method of antimicrobial evaluation.**

All microbial strains were provided from culture collection of the Regional Center for Mycology and Biotechnology (RCMB), Al-Azhar University, Cairo, Egypt. The antimicrobial activity was investigated on a newly synthesized compound in order to increase the selectivity of these derivatives towards test microorganisms using the agar diffusion method using Mueller-Hinton agar medium for bacteria and Sabouraud's agar medium for fungi. Briefly, 100  $\mu$ l of the test bacteria/fungi were grown in 10 mL of fresh media until they reached a count of approximately  $10^8$

cells/mL for bacteria or  $10^5$  cells/mL for fungi. All the newly synthesized compounds were weighed and dissolved in dimethyl sulfoxide to prepare extract stock solution. One hundred  $\mu\text{L}$  of each sample at 5 mg/mL was added to each well (10 mm diameter holes cut in the agar gel). The plates were incubated for 24-48 h at 37 °C (for bacteria and yeast) and for 48 h at 28 °C (for filamentous fungi). After incubation, the microorganism's growth was observed. The resulting inhibition zone diameters were measured in millimeters and used as criterion for the antimicrobial activity. The size of this clear zone is proportional to the inhibitory action of the compound under investigation. DMSO was used for dissolving the tested compounds thus used as solvent control and showed no inhibition zones, confirming that it has no influence on growth of the tested microorganisms. Positive controls were also performed using gentamycin as standard antibacterial drugs and ketoconazole as standard antifungal drug [38,39].

#### Figures of mean zone of inhibition of the newly synthesized pyrazolines

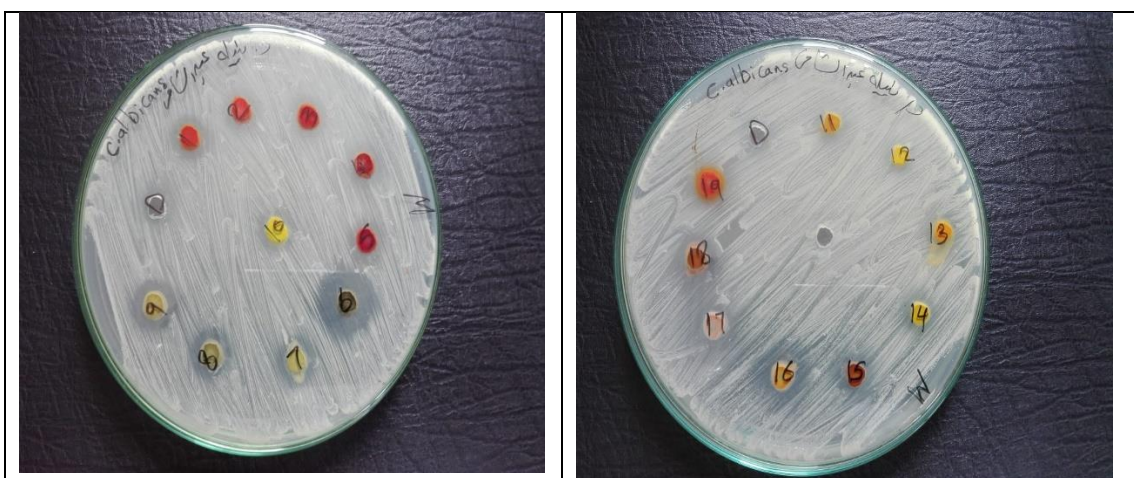

**Fig. S1** Mean zone of inhibition of the newly synthesized pyrazolines tested against *Candida albicans* (RCMB 05036).

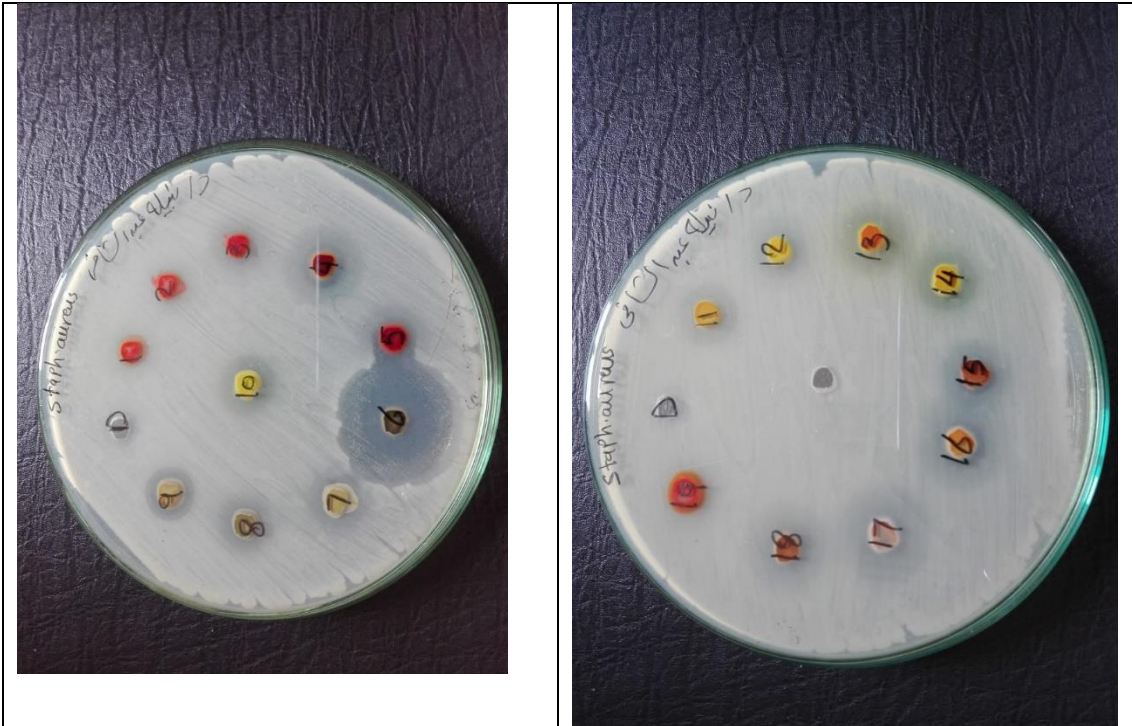

**Fig S2.** Mean zone of inhibition of the newly synthesized pyrazolines tested against *Staphylococcus aureus* (RCMB010010).

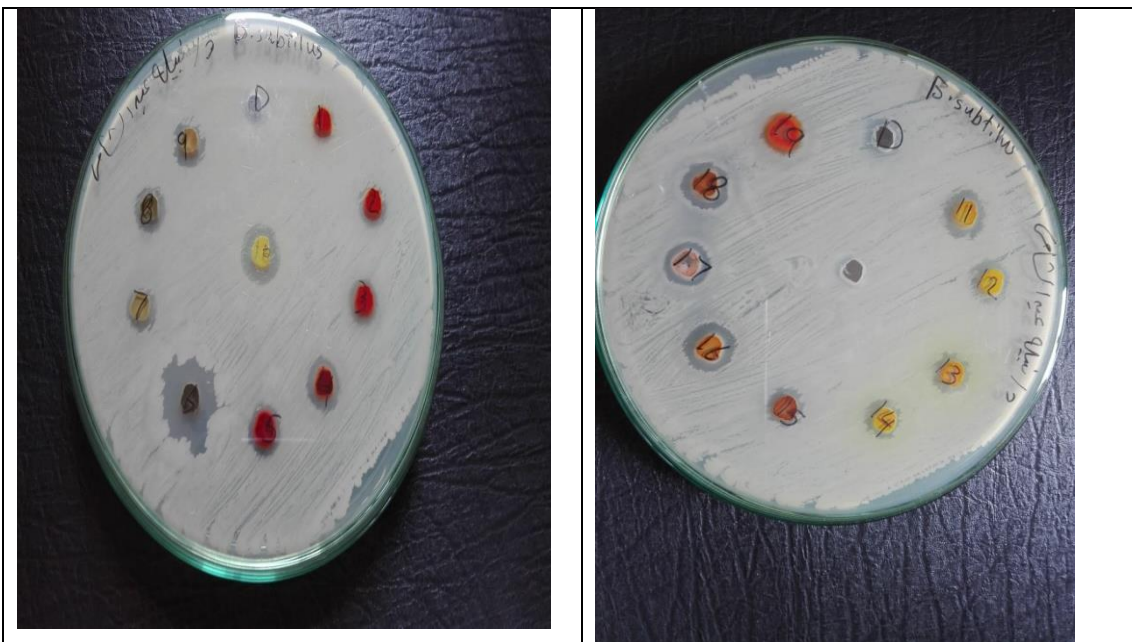

**Fig S3.** Mean zone of inhibition of the newly synthesized pyrazolines tested against *Bacillus subtilis* (RCMB 010067)

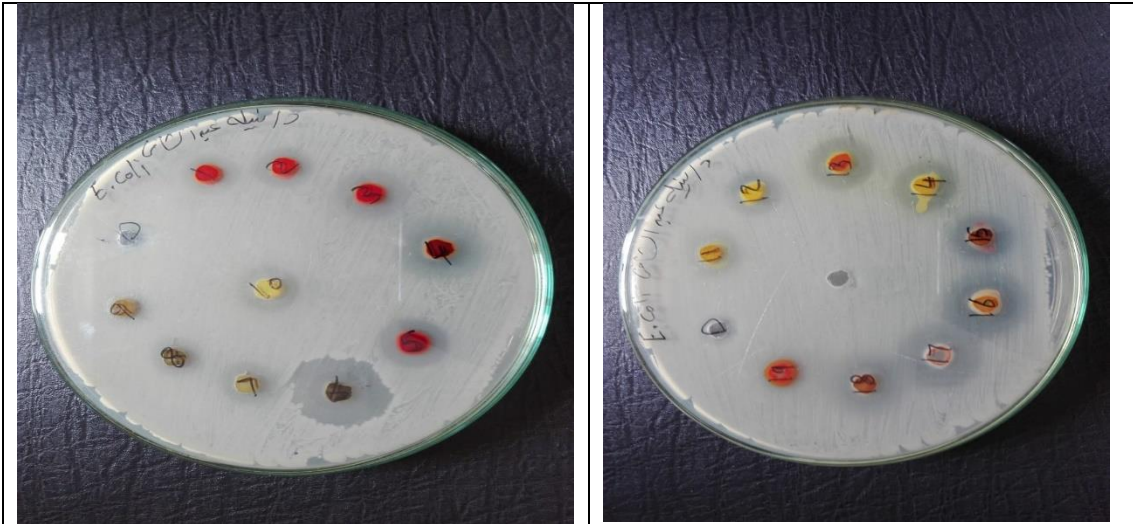

**Fig S4.** Mean zone of inhibition of the newly synthesized pyrazolines tested against *Escherichia coli* (RCMB 010052).

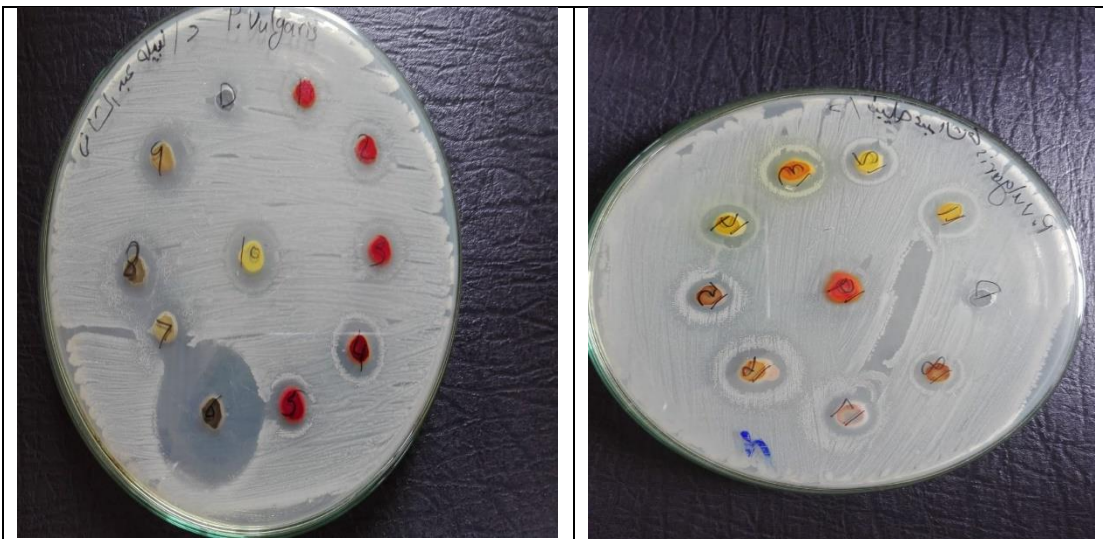

**Fig S5.** Mean zone of inhibition of the newly synthesized pyrazolines tested against *Proteus vulgaris* RCMB 004 (1) ATCC 13315

Zienab AbdElAal\_C\_V1

Microanalytical Unit - FOPCU - NMR laboratory  
www.pharma.cu.edu.eg dir-mau.fopcu@pharma.cu.edu.eg

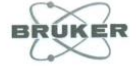

Current Data Parameters  
NAME Zienab AbdElAal\_C\_V1  
EXPNO 10  
PROCNO 1

F2 - Acquisition Parameters  
Date\_ 20180923  
Time 16.10  
INSTRUM spect  
PROBHD 5 mm PABBO BB/  
PULPROG zgpg30  
TD 65536  
SOLVENT DMSO  
NS 1200  
DS 4  
SWH 24038.461 Hz  
FIDRES 0.366798 Hz  
AQ 1.3631488 sec  
RG 202.37  
DN 20.800 usec  
DE 6.50 usec  
TE 298.0 K  
D1 2.00000000 sec  
D11 0.03000000 sec  
TDO 1

==== CHANNEL f1 =====  
SFO1 100.6379178 MHz  
NUC1 13C  
P1 10.00 usec  
PLW1 45.00000000 W

==== CHANNEL f2 =====  
SFO2 400.1916008 MHz  
NUC2 1H  
CPDPRG[2] waltz16

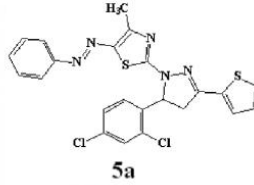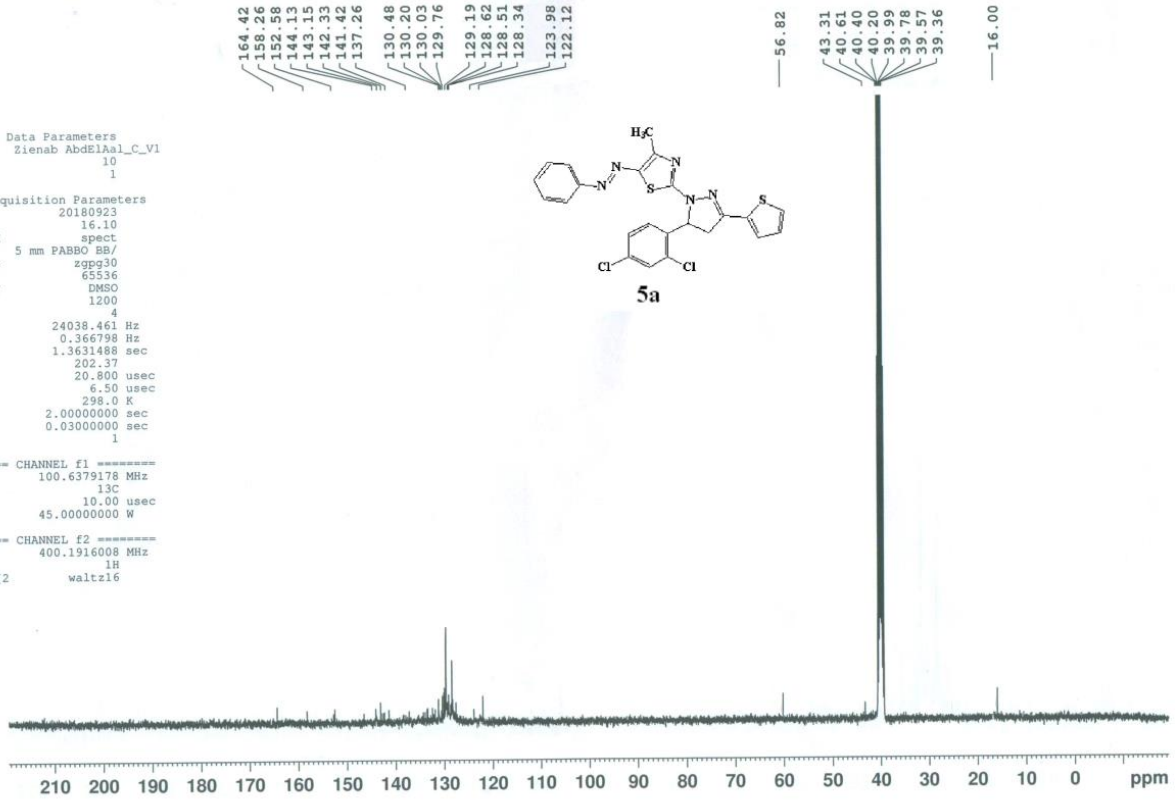

<sup>13</sup>CNMR of compound 5a

Zienab AbdElAal\_H\_V3

Microanalytical Unit - FOPCU - NMR laboratory  
www.pharma.cu.edu.eg dir-mau.fopcu@pharma.cu.edu.eg

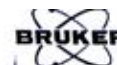

8.9439  
8.9405  
8.6205  
8.1088  
8.0919  
8.0739  
8.0517  
8.0305  
7.8284  
7.8142  
7.7639  
7.7600  
7.7347  
7.6783  
7.6578  
7.6448  
7.6137  
7.6066  
7.5937  
7.5857  
7.4284  
7.4020  
7.3843  
7.3015  
7.2814  
7.2319  
7.2025  
7.1796  
7.1547  
7.1349  
7.0871  
7.0767

2.5982  
2.5900  
2.5804  
2.5691  
2.5411  
2.5093  
2.4627  
2.4489  
2.3596  
2.2933  
2.2636  
2.1614

Current Data Parameters  
NAME Zienab AbdElAal\_H\_V3  
EXPNO 10  
PROCNO 1

F2 - Acquisition Parameters  
Date\_ 20180512  
Time 14.38  
INSTRUM spect  
PROBHD 5 mm PABBO BB  
PULPROG zg30  
TD 65536  
SFO 400.1362600  
SOLVENT DMF0  
NS 32  
DS 2  
SWH 8012.800 Hz  
FIDRES 0.122266 Hz  
AQ 4.0894465 sec  
RG 314.95  
DM 62.400 usec  
DE 6.50 usec  
TE 298.1 K  
SI 1.8000000 sec  
TD0 1

----- CHANNEL f1 -----  
SFO1 400.1362613 MHz  
NUC1 1H  
P1 15.00 usec  
PLW1 10.33939962 W

F2 - Processing parameters  
SI 65536  
SF 400.1360000 MHz  
WDW EM  
SSB 0  
LB 0.30 Hz  
GB 0  
FC 1.00

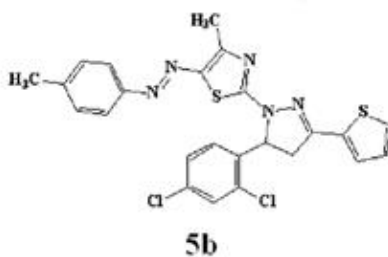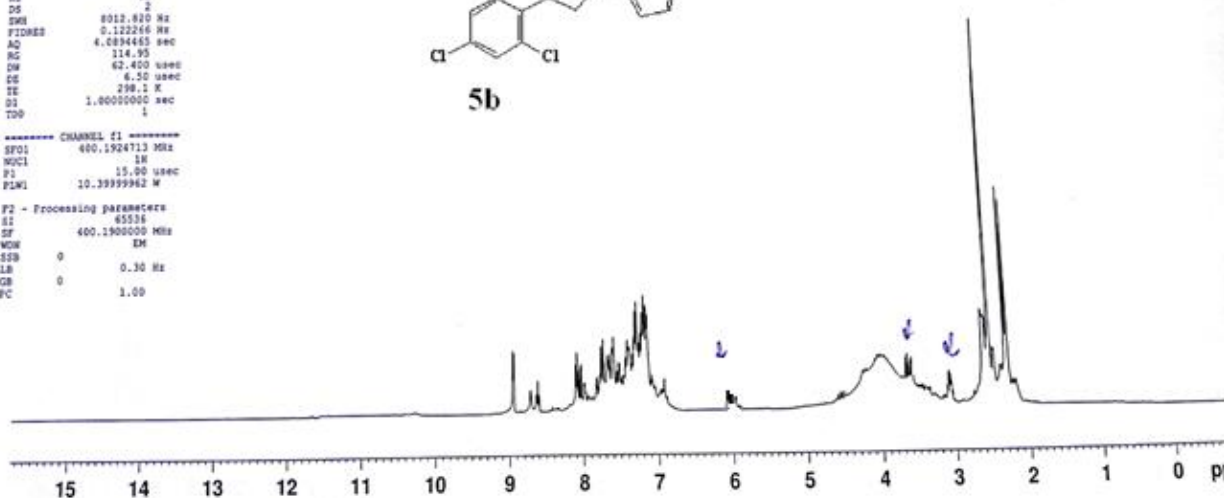

<sup>1</sup>H NMR of compound 5b

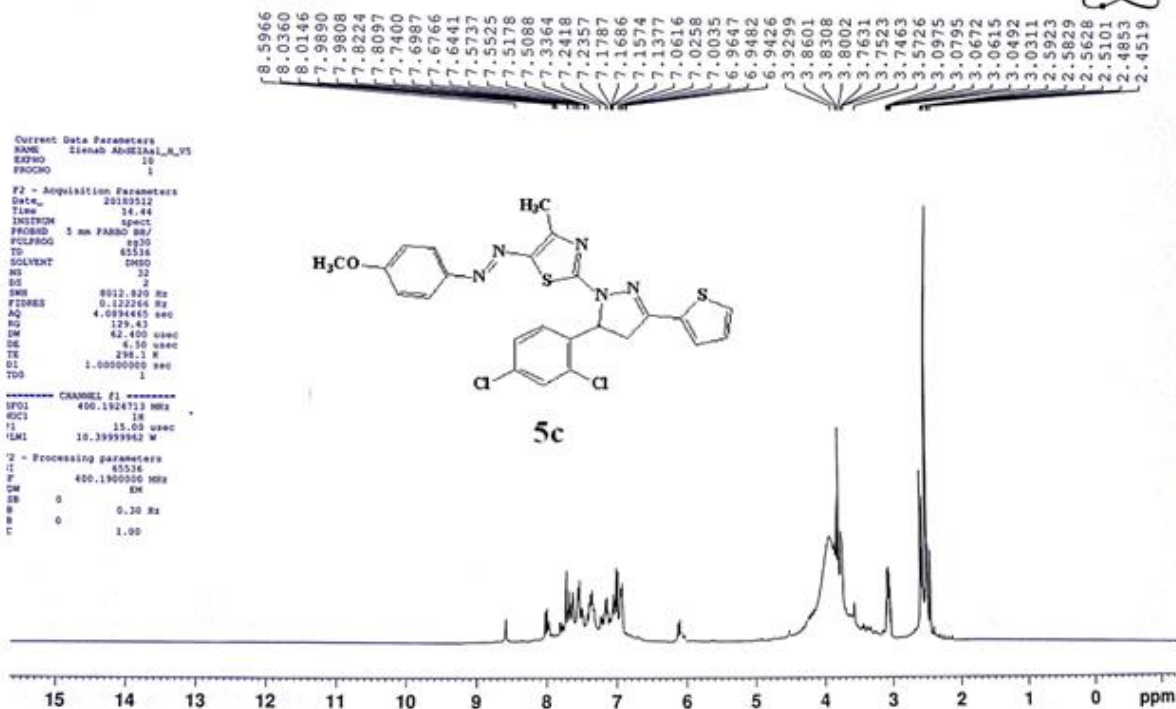

<sup>1</sup>HNMR of compound 5c



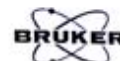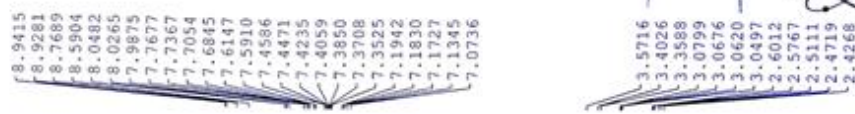

Current Data Parameters  
NAME Zienab AbdElAal\_H\_V2  
EXPNO 10  
PROCNO 1

F2 - Acquisition Parameters  
Date\_ 20180512  
Time 11.33  
INSTRUM spect  
PROBHD 5 mm F4000 QNP/  
PULPROG zgpg30  
TD 65536  
SOLVENT DMSO  
NS 32  
DS 2  
SWH 8012.420 Hz  
FIDRES 0.122246 Hz  
AQ 4.6894453 sec  
RG 114.95  
CW 67.450 usec  
DE 6.50 usec  
TE 298.2 K  
D1 1.00000000 sec  
TD1 1

\*\*\*\*\* CHANNEL f1 \*\*\*\*\*  
NUC1 13C  
P1 15.00 usec  
PL1 0.00 dB

F2 - Processing parameters  
SI 32768  
SF 400.1460000 MHz  
WDW EM  
SSB 0  
LB 0.30 Hz  
GB 0  
PC 1.00

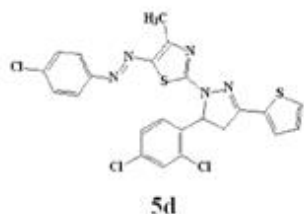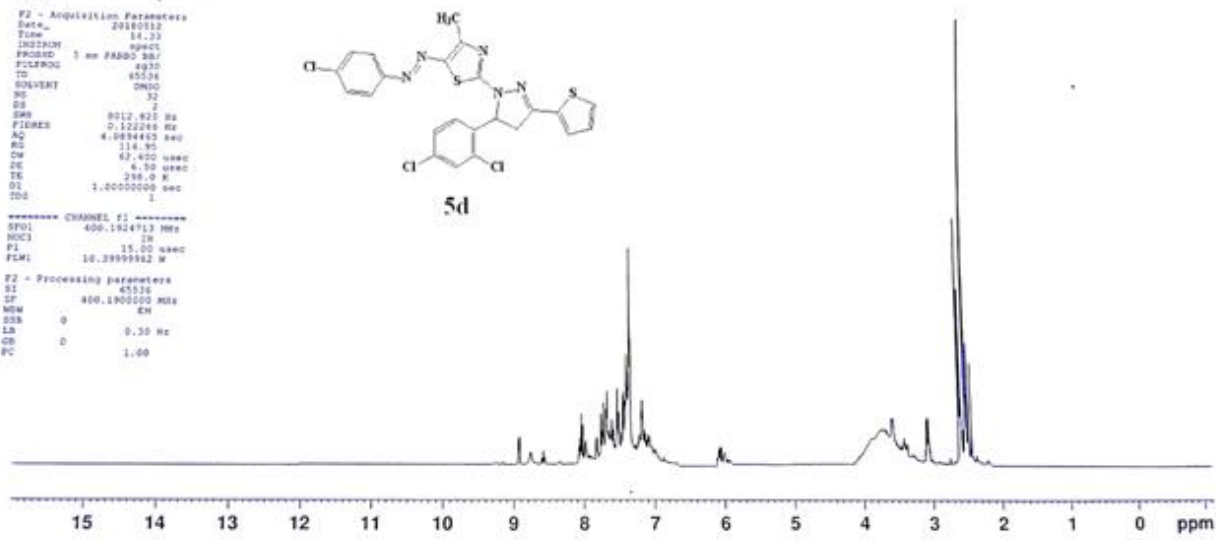

<sup>1</sup>H NMR of compound 5d

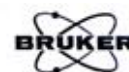

```

Current Data Parameters
NAME: Zienab AbdElAal_H_V19
EXPNO: 10
PROCNO: 1

F2 - Acquisition Parameters
Date_: 20190512
Time: 15:30
INSTRUM: spect
PROBHD: 5 mm PABBO BB/
PULPROG: zgpg30
TD: 65536
SOLVENT: DMSO
NS: 32
DS: 2
SFO1: 400.1524713 MHz
FIDRES: 0.122266 Hz
AQ: 4.0894465 sec
RG: 329.47
CW: 67.400 usec
DE: 6.50 usec
TE: 298.2 K
SI: 1.0000000 sec
TD0: 1

----- CHANNEL f1 -----
SFO1: 400.1524713 MHz
NUC1: 1H
P1: 13.00 usec
PLM1: 10.39999962 W

F2 - Processing parameters
SI: 65536
SF: 400.1500000 MHz
WDW: EM
SSB: 0
LB: 0 0.30 Hz
GB: 0
PC: 1.00
    
```

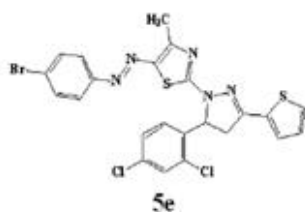

8.4251  
8.3684  
8.3466  
8.1924  
7.6642  
7.6602  
7.5370  
7.5151  
7.4224  
7.4005

3.3473  
3.0706  
3.0536  
2.8815  
2.5099  
2.4994

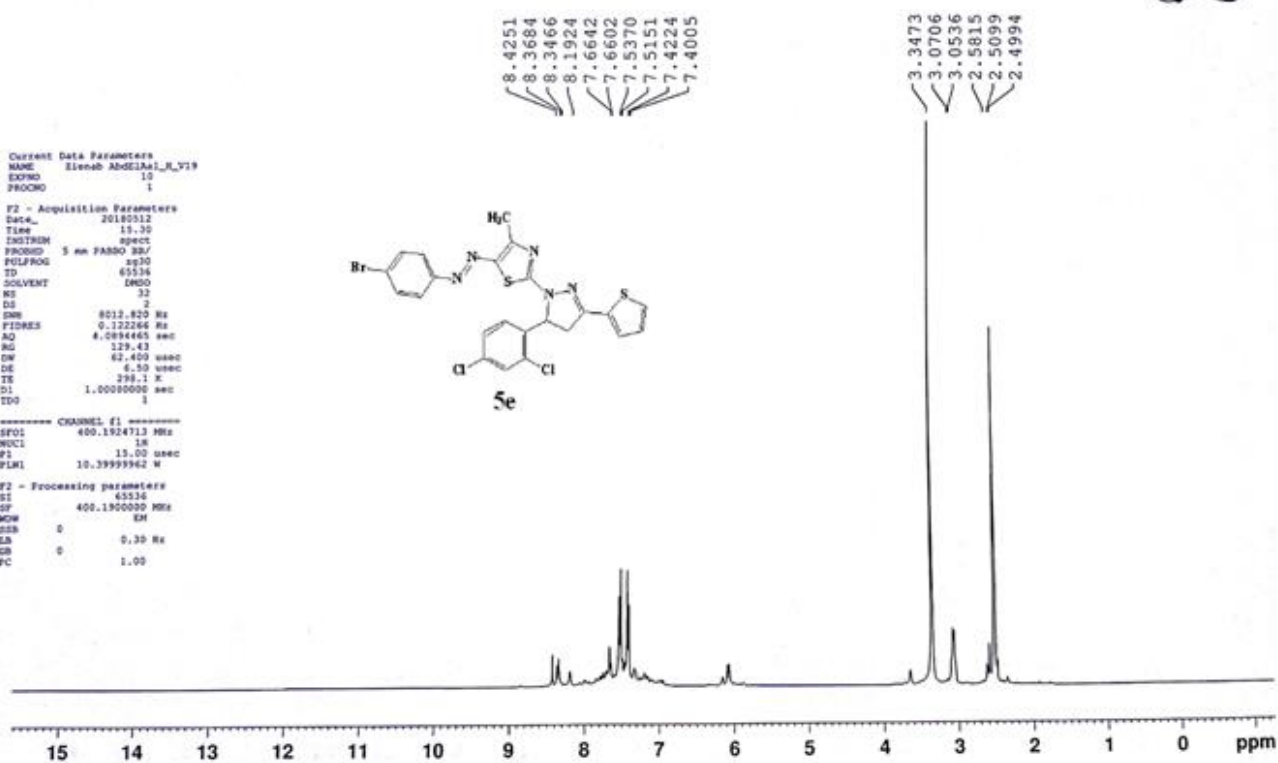

<sup>1</sup>H NMR of compound **5e**



enab AbdElAal\_H\_V12

Microanalytical Unit - FOPCU - NMR laboratory  
www.pharma.cu.edu.eg dir-mau.fopcu@pharma.cu.edu.eg

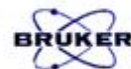

```
Current Data Parameters
NAME      Zienab AbdElAal_H_V12
DOSY0    1
PROCNO   1

===== Acquisition Parameters =====
Date_    20180512
Time     11.09
INSTRUM  spect
PROBHD   5 mm PABBO BB/
PULPROG  zg30
D1       4.5536
SOLVENT  DMF0
SI       32
SF       801.232 MHz
===== CHANNEL f1 =====
NUC1     400.1924113 MHz
NUC1     13C
P1       15.00 usec
PL1     10.39999992 W
===== Processing parameters =====
SI       65536
SF       400.1500000 MHz
WDW      EM
SSB      0
LB       0.30 Hz
GB       0
PC       1.00
```

11.6626  
8.3194  
7.9920  
7.7905  
7.6529  
7.6483  
7.6323  
7.6278  
7.6196  
7.4456  
7.4249  
7.3923  
7.3719  
7.3080  
7.2855  
7.2778  
7.2568  
7.1801  
7.1599  
7.1365  
7.1268  
7.1165

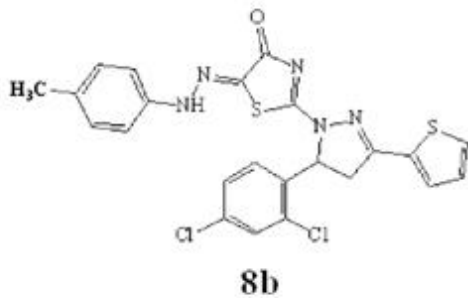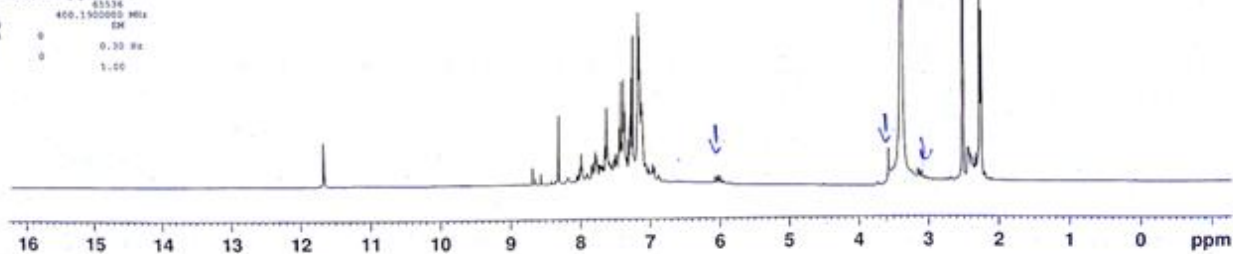

<sup>1</sup>H NMR of compound **8b**

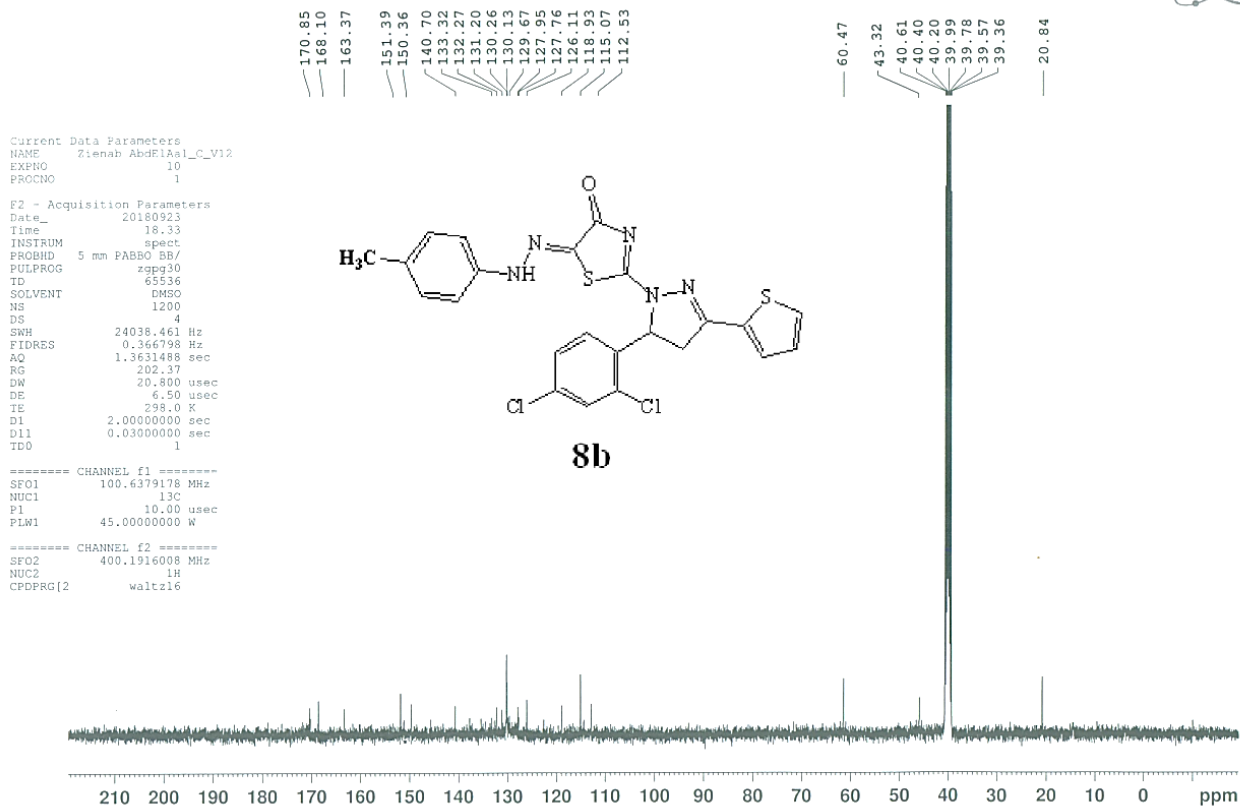 $^{13}\text{C}$ -NMR of compound **8b**

Zienab AbdElAal\_H\_V11

Microanalytical Unit - FOPCU - NMR laboratory  
www.pharma.cu.edu.eg dir-mau.fopcu@pharma.cu.edu.eg

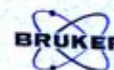

Experiment Data Parameters  
NAME Zienab AbdElAal\_H\_V11  
MSNO 10  
R0000 1

2 - Acquisition Parameters  
Date\_ 20180512  
Time 15.04  
PULPROG zgpg30  
SOLVENT 3 ml PARBO 30%  
INSTRUM spect  
ID 45534  
SOLVENT 0400  
AQ 32  
RG 32  
SWH 8012.800 Hz  
FIDRES 0.122066 Hz  
AQ 4.8994465 sec  
RG 166.06  
SW 62.400 uspc  
DS 4.50 uspc  
TE 298.0 K  
D1 1.20592000 sec  
TDS 1

\*\*\*\*\* CHANNEL f1 \*\*\*\*\*  
NUC1 400.1304713 MHz  
P1 18  
PR 15.00 uspc  
PCPG 10.39999902 W  
F2 - Processing parameters  
SI 45534  
SF 400.1304713 MHz  
WDW EM  
SSB 0  
GB 0.30 Hz  
CB 0  
PC 1.00

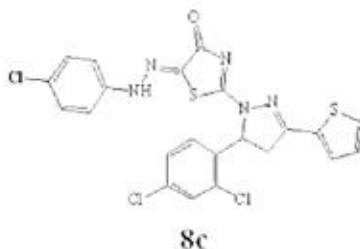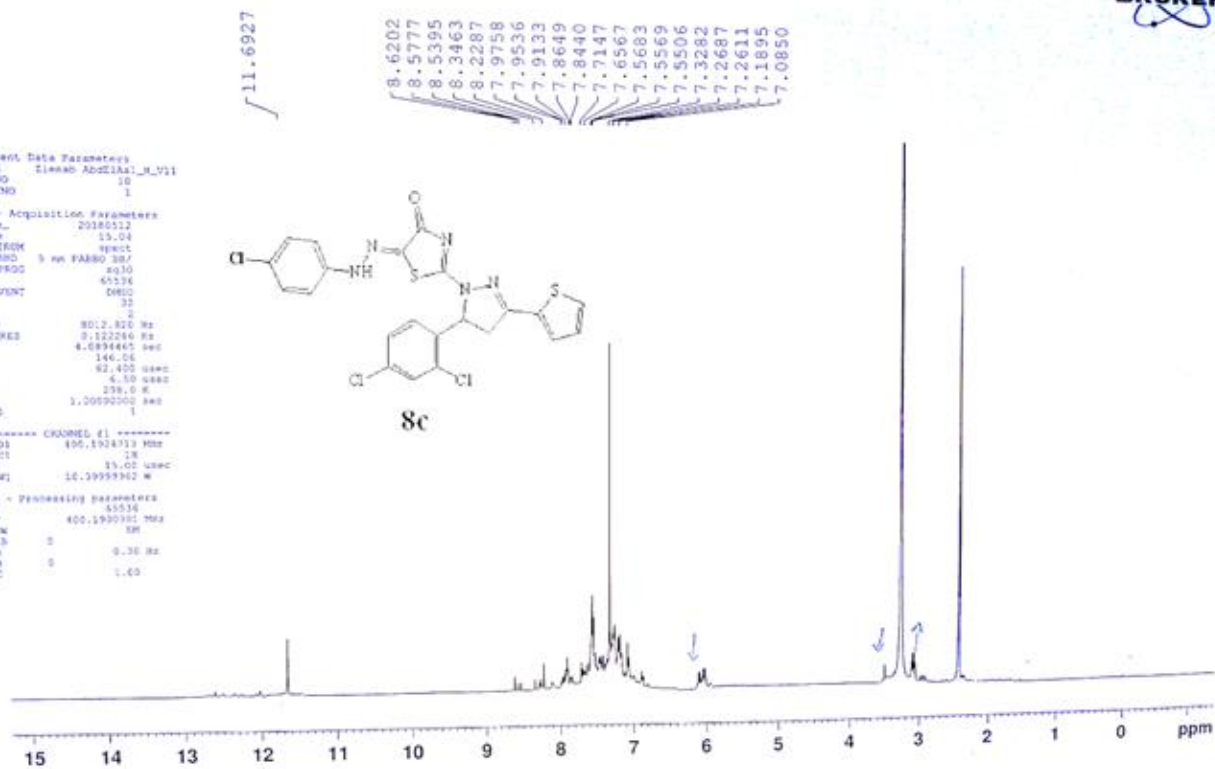

<sup>1</sup>H NMR of compound 8c

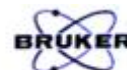

8.3577  
8.0002  
7.9314  
7.9101  
7.7578  
7.7379  
7.6994  
7.6847  
7.5756  
7.5553  
7.5311  
7.5192  
7.5027  
7.4987  
7.4879  
7.4013  
7.3930  
7.3838  
7.3657  
7.3616  
7.3468  
7.3317  
7.2977  
7.2701  
7.2597  
7.2404  
7.1901  
7.1677  
7.1495  
7.0788  
7.0683  
7.0579  
7.0504  
6.9688  
6.9575

Current Data Parameters  
NAME Zienab AbdElAal\_H\_V9  
EXPNO 18  
PROCNO 1

F2 - Acquisition Parameters  
Date\_ 20180328  
Time 14:34  
INSTRUM spect  
PROBHD 5 mm PARO 1H/7  
PULPROG zgpg30  
TD 65536  
SOLVENT DMF0  
NS 32  
DS 2  
SS 8013.420 Hz  
FIDRES 0.122264 Hz  
AQ 4.6034463 sec  
ML 129.43  
DM 62.470 usec  
DE 4.70 usec  
TE 299.1 K  
SI 1.00000000 sec  
TD0 1

\*\*\*\*\* CHANNEL f1 \*\*\*\*\*  
NUC1 15N  
P1 15.00 usec  
PL1 10.39999343 W

F2 - Processing parameters  
SI 65536  
SF 400.1300000 MHz  
WDW EM  
SSB 0  
LB 0.30 Hz  
GB 0  
PC 1.00

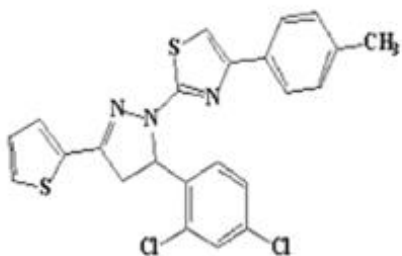

11b

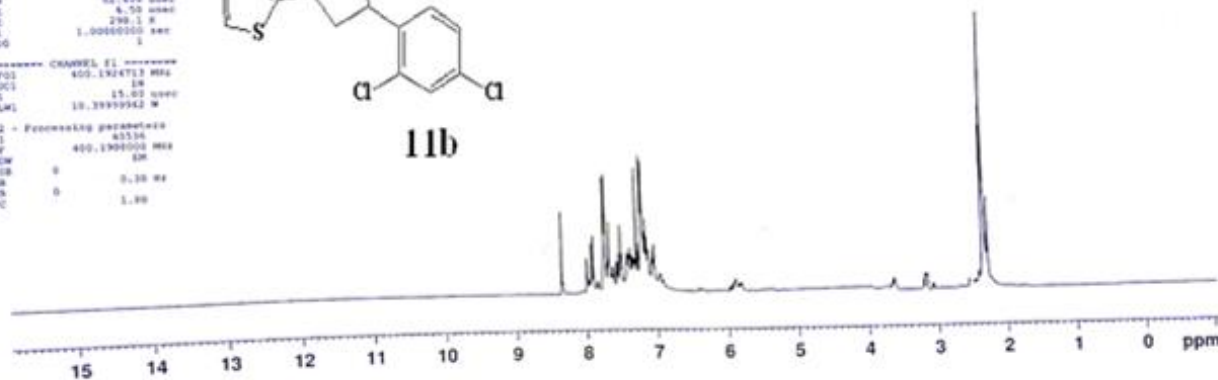

<sup>1</sup>H NMR of compound 11b

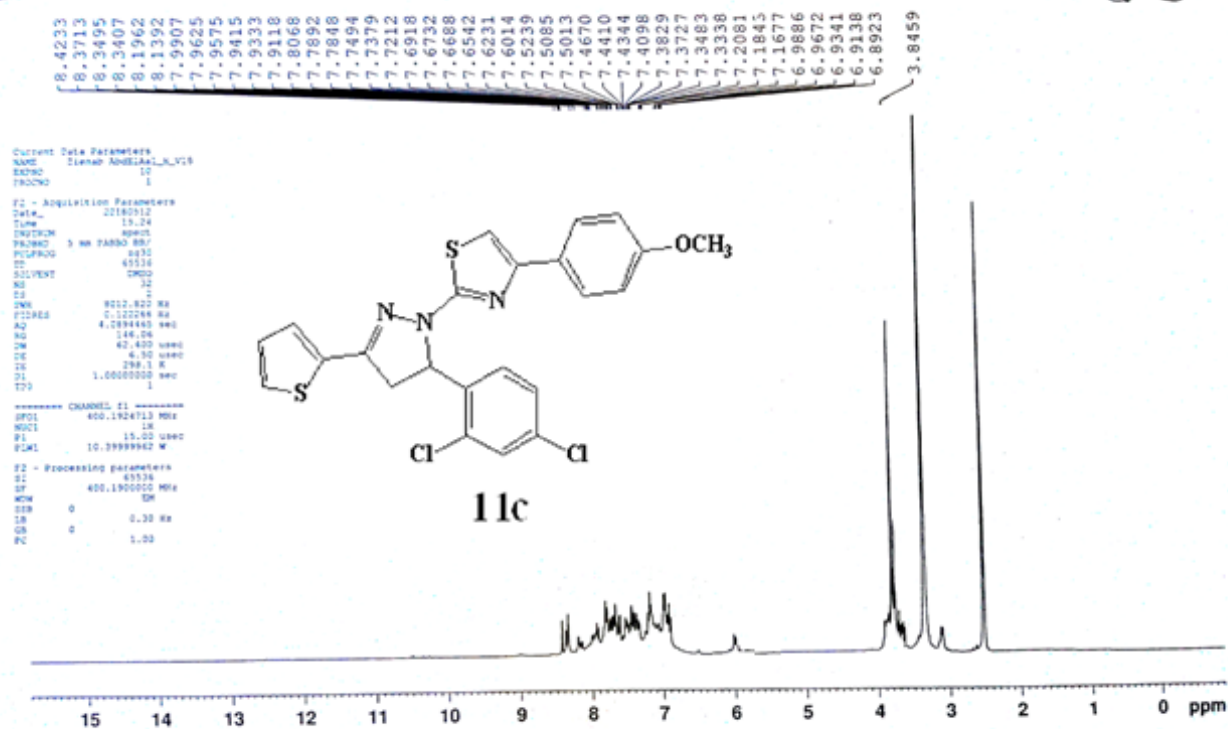<sup>1</sup>H NMR of compound 11c



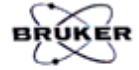

8.3615  
8.0010  
7.9000  
7.9000  
7.9082  
7.9019  
7.8889  
7.8678  
7.7628  
7.7429  
7.7025  
7.6941  
7.6893  
7.6823  
7.5820  
7.5010  
7.4830  
7.4619  
7.4540  
7.4282  
7.4117  
7.3914  
7.3853  
7.3562  
7.2889  
7.2413  
7.2108  
7.1622  
7.0338  
6.9597  
6.9297  
6.9193

```
Current Data Parameters
NAME: Zienab AbdElAal_H_V8
EXPNO: 1
PROCNO: 1

F2 - Acquisition Parameters
Date_ 20180512
Time 16.49
INSTRUM spect
PROBHD 1 mm QNP5 1H/
PULPROG zgpg30
TD 65536
SFO 400.136
AQ 0.00000000 sec
RG 32
DE 4.00 usec
TE 300.2 K
D1 1.00000000 sec
D2 0.00000000 sec
D3 0.00000000 sec
D4 0.00000000 sec
D5 0.00000000 sec
D6 0.00000000 sec
D7 0.00000000 sec
D8 0.00000000 sec
D9 0.00000000 sec
D10 0.00000000 sec
D11 0.00000000 sec
D12 0.00000000 sec
D13 0.00000000 sec
D14 0.00000000 sec
D15 0.00000000 sec
D16 0.00000000 sec
D17 0.00000000 sec
D18 0.00000000 sec
D19 0.00000000 sec
D20 0.00000000 sec
D21 0.00000000 sec
D22 0.00000000 sec
D23 0.00000000 sec
D24 0.00000000 sec
D25 0.00000000 sec
D26 0.00000000 sec
D27 0.00000000 sec
D28 0.00000000 sec
D29 0.00000000 sec
D30 0.00000000 sec
D31 0.00000000 sec
D32 0.00000000 sec
D33 0.00000000 sec
D34 0.00000000 sec
D35 0.00000000 sec
D36 0.00000000 sec
D37 0.00000000 sec
D38 0.00000000 sec
D39 0.00000000 sec
D40 0.00000000 sec
D41 0.00000000 sec
D42 0.00000000 sec
D43 0.00000000 sec
D44 0.00000000 sec
D45 0.00000000 sec
D46 0.00000000 sec
D47 0.00000000 sec
D48 0.00000000 sec
D49 0.00000000 sec
D50 0.00000000 sec
D51 0.00000000 sec
D52 0.00000000 sec
D53 0.00000000 sec
D54 0.00000000 sec
D55 0.00000000 sec
D56 0.00000000 sec
D57 0.00000000 sec
D58 0.00000000 sec
D59 0.00000000 sec
D60 0.00000000 sec
D61 0.00000000 sec
D62 0.00000000 sec
D63 0.00000000 sec
D64 0.00000000 sec
D65 0.00000000 sec
D66 0.00000000 sec
D67 0.00000000 sec
D68 0.00000000 sec
D69 0.00000000 sec
D70 0.00000000 sec
D71 0.00000000 sec
D72 0.00000000 sec
D73 0.00000000 sec
D74 0.00000000 sec
D75 0.00000000 sec
D76 0.00000000 sec
D77 0.00000000 sec
D78 0.00000000 sec
D79 0.00000000 sec
D80 0.00000000 sec
D81 0.00000000 sec
D82 0.00000000 sec
D83 0.00000000 sec
D84 0.00000000 sec
D85 0.00000000 sec
D86 0.00000000 sec
D87 0.00000000 sec
D88 0.00000000 sec
D89 0.00000000 sec
D90 0.00000000 sec
D91 0.00000000 sec
D92 0.00000000 sec
D93 0.00000000 sec
D94 0.00000000 sec
D95 0.00000000 sec
D96 0.00000000 sec
D97 0.00000000 sec
D98 0.00000000 sec
D99 0.00000000 sec
D100 0.00000000 sec

===== CHANNEL f1 =====
NUC1 13C
P1 12.00 usec
PL1 0.00 dB
SFO 101.625381 MHz

F2 - Processing parameters
SI 32768
SF 400.1360000 MHz
WDW EM
SSB 0
LB 0.30 Hz
GB 0
PC 1.00
```

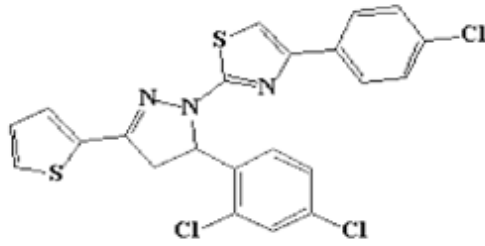

11d

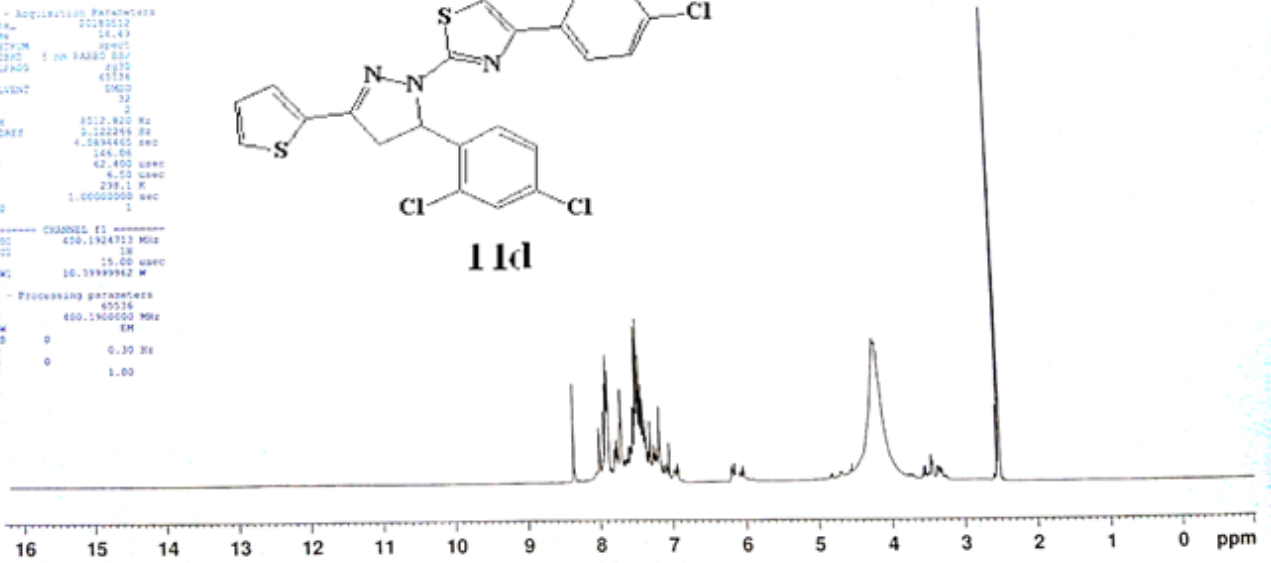

<sup>1</sup>H NMR of compound 11d

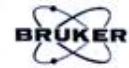

8.4233  
8.3516  
8.2816  
8.2680  
8.2619  
8.2472  
7.9353  
7.9132  
7.8852  
7.8721  
7.7565  
7.7440  
7.7341  
7.7194  
7.6985  
7.5312  
7.5014  
7.4409  
7.4134  
7.3833  
7.3696  
7.3466  
7.2711  
7.2490  
7.2277  
7.2037  
7.1814

```
Current Data Parameters
NAME: Zienab ABDI AAL_H_V15
PROCNO: 1
F2 - Acquisition Parameters
Date_ 20160512
Time 15.14
INSTRUM spect
PROBHD 5 mm F4000 BBO
PULPROG zgpg30
TE 300.2
D1 0.05000000
d11 0.02000000
d12 0.02000000
d13 0.02000000
d14 0.02000000
d15 0.02000000
d16 0.02000000
d17 0.02000000
d18 0.02000000
d19 0.02000000
d20 0.02000000
d21 0.02000000
d22 0.02000000
d23 0.02000000
d24 0.02000000
d25 0.02000000
d26 0.02000000
d27 0.02000000
d28 0.02000000
d29 0.02000000
d30 0.02000000
d31 0.02000000
d32 0.02000000
d33 0.02000000
d34 0.02000000
d35 0.02000000
d36 0.02000000
d37 0.02000000
d38 0.02000000
d39 0.02000000
d40 0.02000000
d41 0.02000000
d42 0.02000000
d43 0.02000000
d44 0.02000000
d45 0.02000000
d46 0.02000000
d47 0.02000000
d48 0.02000000
d49 0.02000000
d50 0.02000000
d51 0.02000000
d52 0.02000000
d53 0.02000000
d54 0.02000000
d55 0.02000000
d56 0.02000000
d57 0.02000000
d58 0.02000000
d59 0.02000000
d60 0.02000000
d61 0.02000000
d62 0.02000000
d63 0.02000000
d64 0.02000000
d65 0.02000000
d66 0.02000000
d67 0.02000000
d68 0.02000000
d69 0.02000000
d70 0.02000000
d71 0.02000000
d72 0.02000000
d73 0.02000000
d74 0.02000000
d75 0.02000000
d76 0.02000000
d77 0.02000000
d78 0.02000000
d79 0.02000000
d80 0.02000000
d81 0.02000000
d82 0.02000000
d83 0.02000000
d84 0.02000000
d85 0.02000000
d86 0.02000000
d87 0.02000000
d88 0.02000000
d89 0.02000000
d90 0.02000000
d91 0.02000000
d92 0.02000000
d93 0.02000000
d94 0.02000000
d95 0.02000000
d96 0.02000000
d97 0.02000000
d98 0.02000000
d99 0.02000000
d100 0.02000000
===== CHANNEL f1 =====
NUC1 13C
PULPROG zgpg30
TE 300.2
D1 0.05000000
d11 0.02000000
d12 0.02000000
d13 0.02000000
d14 0.02000000
d15 0.02000000
d16 0.02000000
d17 0.02000000
d18 0.02000000
d19 0.02000000
d20 0.02000000
d21 0.02000000
d22 0.02000000
d23 0.02000000
d24 0.02000000
d25 0.02000000
d26 0.02000000
d27 0.02000000
d28 0.02000000
d29 0.02000000
d30 0.02000000
d31 0.02000000
d32 0.02000000
d33 0.02000000
d34 0.02000000
d35 0.02000000
d36 0.02000000
d37 0.02000000
d38 0.02000000
d39 0.02000000
d40 0.02000000
d41 0.02000000
d42 0.02000000
d43 0.02000000
d44 0.02000000
d45 0.02000000
d46 0.02000000
d47 0.02000000
d48 0.02000000
d49 0.02000000
d50 0.02000000
d51 0.02000000
d52 0.02000000
d53 0.02000000
d54 0.02000000
d55 0.02000000
d56 0.02000000
d57 0.02000000
d58 0.02000000
d59 0.02000000
d60 0.02000000
d61 0.02000000
d62 0.02000000
d63 0.02000000
d64 0.02000000
d65 0.02000000
d66 0.02000000
d67 0.02000000
d68 0.02000000
d69 0.02000000
d70 0.02000000
d71 0.02000000
d72 0.02000000
d73 0.02000000
d74 0.02000000
d75 0.02000000
d76 0.02000000
d77 0.02000000
d78 0.02000000
d79 0.02000000
d80 0.02000000
d81 0.02000000
d82 0.02000000
d83 0.02000000
d84 0.02000000
d85 0.02000000
d86 0.02000000
d87 0.02000000
d88 0.02000000
d89 0.02000000
d90 0.02000000
d91 0.02000000
d92 0.02000000
d93 0.02000000
d94 0.02000000
d95 0.02000000
d96 0.02000000
d97 0.02000000
d98 0.02000000
d99 0.02000000
d100 0.02000000
===== CHANNEL f2 =====
NUC1 1H
PULPROG zgpg30
TE 300.2
D1 0.05000000
d11 0.02000000
d12 0.02000000
d13 0.02000000
d14 0.02000000
d15 0.02000000
d16 0.02000000
d17 0.02000000
d18 0.02000000
d19 0.02000000
d20 0.02000000
d21 0.02000000
d22 0.02000000
d23 0.02000000
d24 0.02000000
d25 0.02000000
d26 0.02000000
d27 0.02000000
d28 0.02000000
d29 0.02000000
d30 0.02000000
d31 0.02000000
d32 0.02000000
d33 0.02000000
d34 0.02000000
d35 0.02000000
d36 0.02000000
d37 0.02000000
d38 0.02000000
d39 0.02000000
d40 0.02000000
d41 0.02000000
d42 0.02000000
d43 0.02000000
d44 0.02000000
d45 0.02000000
d46 0.02000000
d47 0.02000000
d48 0.02000000
d49 0.02000000
d50 0.02000000
d51 0.02000000
d52 0.02000000
d53 0.02000000
d54 0.02000000
d55 0.02000000
d56 0.02000000
d57 0.02000000
d58 0.02000000
d59 0.02000000
d60 0.02000000
d61 0.02000000
d62 0.02000000
d63 0.02000000
d64 0.02000000
d65 0.02000000
d66 0.02000000
d67 0.02000000
d68 0.02000000
d69 0.02000000
d70 0.02000000
d71 0.02000000
d72 0.02000000
d73 0.02000000
d74 0.02000000
d75 0.02000000
d76 0.02000000
d77 0.02000000
d78 0.02000000
d79 0.02000000
d80 0.02000000
d81 0.02000000
d82 0.02000000
d83 0.02000000
d84 0.02000000
d85 0.02000000
d86 0.02000000
d87 0.02000000
d88 0.02000000
d89 0.02000000
d90 0.02000000
d91 0.02000000
d92 0.02000000
d93 0.02000000
d94 0.02000000
d95 0.02000000
d96 0.02000000
d97 0.02000000
d98 0.02000000
d99 0.02000000
d100 0.02000000
```

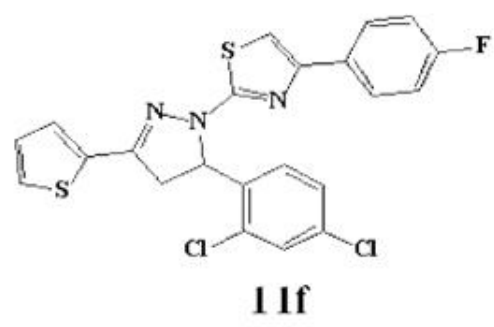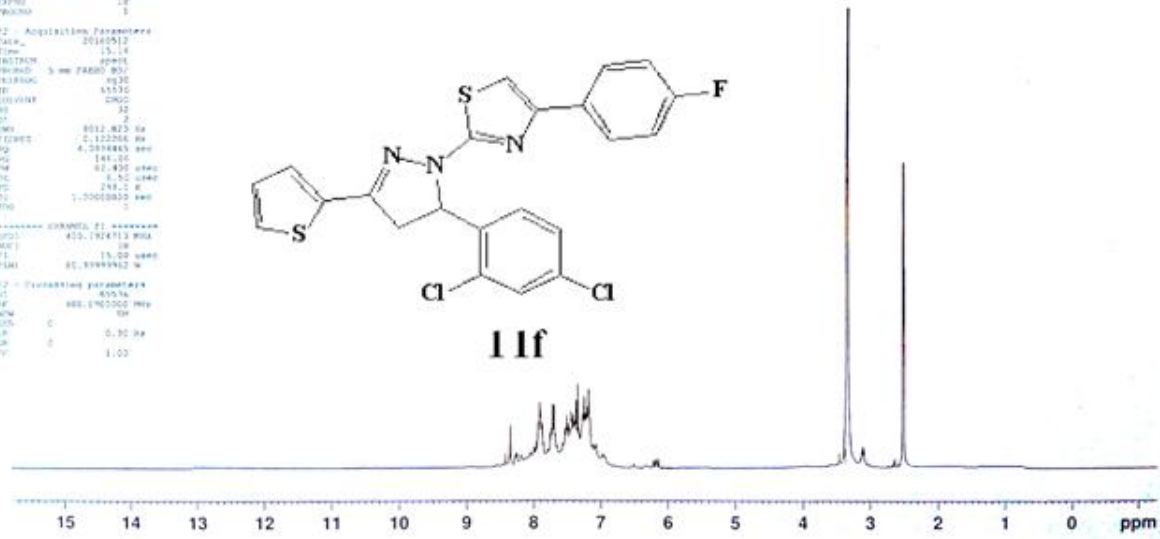

<sup>1</sup>H NMR of compound **11f**
